# Supplementary material
Source: PubMed Central journal article supplement (PMC11000140)
Supplement: NIHMS1979079-supplement-2.pdf [file NIHMS1979079-supplement-2.pdf]

**Appendix Table 1.** Joinpoint Regression Results for Unit Sales and Average Unit Price of Cigar Products, by Type

|                                    | Unit sales |                |          |                                | Average unit price |                |          |
|------------------------------------|------------|----------------|----------|--------------------------------|--------------------|----------------|----------|
|                                    | AMPC (%)   | 95% CI         | <i>p</i> |                                | AMPC (%)           | 95% CI         | <i>p</i> |
| <i>Cigars</i>                      |            |                |          |                                |                    |                |          |
| Full range                         | 0.6        | (0.4 to 0.8)   | <.001    | Full range                     | 0.0                | (-0.2 to 0.1)  | .400     |
| January 30, 2016–November 5, 2016  | 2.1        | (1.3 to 2.8)   | <.001    | January 30, 2016–May 20, 2017  | -0.6               | (-0.7 to -0.5) | <.001    |
| November 5, 2016–February 22, 2020 | 0.0        | (-0.1 to 0.1)  | .814     | May 20, 2017–August 12, 2017   | 4.5                | (2.4 to 6.7)   | <.001    |
| February 22, 2020–June 13, 2020    | 3.5        | (0.9 to 6.2)   | .009     | August 12, 2017–June 13, 2020  | -0.1               | (-0.2 to -0.1) | <.001    |
| <i>Cigarillos</i>                  |            |                |          |                                |                    |                |          |
| Full range                         | 0.7        | (0.4 to 0.9)   | <.001    | Full range                     | 0.0                | (-0.1 to 0.1)  | .800     |
| January 30, 2016–November 5, 2016  | 2.2        | (1.4 to 3.0)   | <.001    | January 30, 2016–May 20, 2017  | -0.6               | (-0.7 to -0.5) | <.001    |
| November 5, 2016–February 22, 2020 | 0.1        | (0.0 to 0.2)   | .277     | May 20, 2017–August 12, 2017   | 5.0                | (3.0 to 7.0)   | <.001    |
| February 22, 2020–June 13, 2020    | 3.6        | (0.9 to 6.4)   | .009     | August 12, 2017–June 13, 2020  | -0.1               | (-0.2 to -0.1) | <.001    |
| <i>Large cigars</i>                |            |                |          |                                |                    |                |          |
| Full range                         | -0.8       | (-1.0 to -0.7) | <.001    | Full range                     | 0.6                | (0.3 to 0.8)   | <.001    |
| —                                  | —          | —              | —        | January 30, 2016–June 18, 2016 | 3.2                | (1.2 to 5.2)   | .002     |
| —                                  | —          | —              | —        | June 18, 2016–January 28, 2017 | -1.1               | (-2.3 to 0.2)  | .085     |
| —                                  | —          | —              | —        | January 28, 2017–June 13, 2020 | 0.6                | (0.5 to 0.7)   | <.001    |
| <i>Little cigars</i>               |            |                |          |                                |                    |                |          |
| Full range                         | -0.2       | (-0.4 to -0.1) | <.001    | Full range                     | 0.0                | (-0.1 to 0.1)  | .600     |
| January 30, 2016–August 13, 2016   | 1.6        | (0.4 to 2.8)   | .011     | January 30, 2016–June 18, 2016 | 0.7                | (-0.1 to 1.4)  | .071     |
| August 13, 2016–June 13, 2020      | -0.5       | (-0.6 to -0.4) | <.001    | June 18, 2016–June 15, 2019    | -0.3               | (-0.3 to -0.2) | <.001    |
| —                                  | —          | —              | —        | June 15, 2019–April 18, 2020   | 0.2                | (-0.1 to 0.4)  | .214     |
| —                                  | —          | —              | —        | April 18, 2020–June 13, 2020   | 1.0                | (-0.7 to 4.4)  | .145     |

**Appendix Table 2.** Annual Total Cigar Unit Sales and Unit Sale Share by Type and Flavor, 2016–2020

|                     | 2016          |                    | 2017          |                    | 2018          |                    | 2019          |                    | 2020 (January–June) <sup>a</sup> |                    |
|---------------------|---------------|--------------------|---------------|--------------------|---------------|--------------------|---------------|--------------------|----------------------------------|--------------------|
|                     | Unit sales    | Unit sale share, % | Unit sales                       | Unit sale share, % |
| <i>Cigarillo</i>    |               |                    |               |                    |               |                    |               |                    |                                  |                    |
| Tobacco/unflavored  | 966 371 155   | 48.9               | 1 110 838 454 | 51.0               | 1 139 467 617 | 51.3               | 1 148 109 346 | 52.2               | 560 924 170                      | 51.7               |
| Fruit               | 481 205 863   | 24.4               | 521 575 147   | 23.9               | 516 121 467   | 23.3               | 456 367 502   | 20.7               | 210 455 192                      | 19.4               |
| Candy/sweets        | 272 736 419   | 13.8               | 298 994 315   | 13.7               | 333 284 906   | 15.0               | 365 946 905   | 16.6               | 187 449 370                      | 17.3               |
| Alcohol             | 159 029 407   | 8.0                | 143 860 383   | 6.6                | 134 765 662   | 6.1                | 130 715 541   | 5.9                | 70 653 172                       | 6.5                |
| Other               | 13 111 164    | 0.7                | 14 841 597    | 0.7                | 15 725 213    | 0.7                | 17 316 567    | 0.8                | 14 702 599                       | 1.4                |
| Coffee              | 12 941 194    | 0.7                | 15 603 359    | 0.7                | 13 510 209    | 0.6                | 12 407 830    | 0.6                | 5 353 727                        | 0.5                |
| Menthol             | 12 771 941    | 0.6                | 11 247 422    | 0.5                | 7 360 271     | 0.3                | 6 476 130     | 0.3                | 3 177 910                        | 0.3                |
| Not stated          | 57 844 734    | 2.9                | 60 833 533    | 2.8                | 59 210 289    | 2.7                | 62 404 852    | 2.8                | 31 828 843                       | 2.9                |
| Total               | 1 976 011 876 | 92.3               | 2 177 794 209 | 93.2               | 2 219 445 634 | 93.9               | 2 199 744 672 | 94.4               | 1 084 544 982                    | 95.0               |
| <i>Large cigar</i>  |               |                    |               |                    |               |                    |               |                    |                                  |                    |
| Tobacco/unflavored  | 77 577 014    | 86.6               | 71 705 598    | 86.4               | 61 094 931    | 85.4               | 53 967 472    | 83.3               | 23 513 029                       | 84.2               |
| Fruit               | 195 275       | 0.2                | 139 718       | 0.2                | 34 548        | 0.0                | 16 467        | 0.0                | 7107                             | 0.0                |
| Candy/sweets        | 3 631 616     | 4.1                | 3 445 631     | 4.2                | 2 821 397     | 3.9                | 2 229 608     | 3.4                | 811 822                          | 2.9                |
| Alcohol             | 2 314 792     | 2.6                | 2 449 632     | 3.0                | 2 891 008     | 4.0                | 3 007 349     | 4.6                | 1 363 344                        | 4.9                |
| Other               | 73 675        | 0.1                | 30 785        | 0.0                | 19 735        | 0.0                | 21 786        | 0.0                | 9413                             | 0.0                |
| Coffee              | 100 248       | 0.1                | 125 647       | 0.2                | 116 160       | 0.2                | 118 425       | 0.2                | 43 720                           | 0.2                |
| Menthol             | 0             | 0.0                | 40            | 0.0                | 0             | 0.0                | 0             | 0.0                | 0                                | 0.0                |
| Not stated          | 5 716 881     | 6.4                | 5 064 630     | 6.1                | 4 546 228     | 6.4                | 5 427 477     | 8.4                | 2 176 170                        | 7.8                |
| Total               | 89 609 502    | 4.2                | 82 961 681    | 3.6                | 71 524 007    | 3.0                | 64 788 585    | 2.8                | 27 924 605                       | 2.4                |
| <i>Little cigar</i> |               |                    |               |                    |               |                    |               |                    |                                  |                    |
| Tobacco/unflavored  | 41 245 741    | 54.2               | 40 356 803    | 53.7               | 37 883 628    | 52.5               | 33 872 422    | 51.4               | 14 869 162                       | 51.5               |
| Fruit               | 10 409 531    | 13.7               | 9 564 614     | 12.7               | 9 313 181     | 12.9               | 8 516 030     | 12.9               | 3 834 941                        | 13.3               |
| Candy/sweets        | 7 325 497     | 9.6                | 7 890 323     | 10.5               | 8 005 404     | 11.1               | 7 680 462     | 11.6               | 3 206 831                        | 11.1               |
| Alcohol             | 20 646        | 0.03               | 7031          | 0.0                | 1041          | 0.001              | 478           | 0.001              | 253                              | 0.001              |
| Other               | 356 648       | 0.5                | 117 329       | 0.2                | 32 177        | 0.0                | 40 101        | 0.1                | 52 624                           | 0.2                |
| Coffee              | 0             | 0.0                | 0             | 0.0                | 0             | 0.0                | 0             | 0.0                | 0                                | 0.0                |
| Menthol             | 16 220 884    | 21.3               | 16 725 752    | 22.3               | 16 755 212    | 23.2               | 15 763 080    | 23.9               | 6 888 256                        | 23.8               |
| Not stated          | 485 461       | 0.6                | 462 385       | 0.6                | 173 753       | 0.2                | 90 826        | 0.1                | 33 551                           | 0.1                |
| Total               | 76 064 407    | 3.6                | 75 124 237    | 3.2                | 72 164 397    | 3.1                | 65 963 399    | 2.8                | 28 885 619                       | 2.5                |
| Overall             | 2 141 685 784 |                    | 2 335 880 127 |                    | 2 363 134 037 |                    | 2 330 496 656 |                    | 1 141 355 206                    |                    |

<sup>a</sup>The total unit sales in 2020 are only through June 2020. The “other” flavor category included mint, cannabis, clove, and concept flavors such as “purple wave” and “midnight hour.” Products without flavor description were categorized as “not stated.” Unflavored cigars with sweetener added (eg, Swisher Sweets, Tampa Sweets, Phillies Sweets) are classified as “tobacco/unflavored” rather than “candy/sweet.” Unit sale share was calculated as unit sales of a specific category (eg, product type or flavor), divided by total unit sales. Unit sale share of total cigarillo, large cigar, and little cigar was calculated among all cigar products (overall).
